# Supplementary material
Source: bioRxiv or medRxiv preprint supplement (https://medrxiv.org/highwire/filestream/70164/field_highwire_adjunct_files/0/19011999-1.pdf)
Supplement: Supplementary file [file 19011999-1.pdf]

## Supplemental Tables

**Supplemental Table 1. Cohort level association statistics for genome-wide significant variants in the meta-analysis**

| <b>SNP</b>  | <b>ANRS<br/>BETA</b> | <b>ANRS<br/>P</b> | <b>SHCS<br/>BETA</b> | <b>SHCS<br/>P</b> | <b>MACS<br/>BETA</b> | <b>MACS P</b> |
|-------------|----------------------|-------------------|----------------------|-------------------|----------------------|---------------|
| rs7919208   | 0.32                 | 2.78E-10          | 0.12                 | 2.66E-03          | -0.06                | 0.57          |
| rs149399290 | 0.28                 | 7.93E-07          | 0.13                 | 2.30E-03          | -0.03                | 0.79          |
| rs17155463  | 0.28                 | 7.93E-07          | 0.13                 | 2.30E-03          | -0.03                | 0.79          |
| rs17155474  | 0.28                 | 7.93E-07          | 0.13                 | 2.30E-03          | -0.03                | 0.79          |
| rs17155478  | 0.28                 | 7.93E-07          | 0.13                 | 2.30E-03          | -0.03                | 0.79          |
| rs12249837  | 0.28                 | 7.93E-07          | 0.13                 | 2.30E-03          | -0.03                | 0.79          |
| rs10608969  | 0.28                 | 7.93E-07          | 0.13                 | 2.30E-03          | -0.03                | 0.79          |

The analyses were performed using linear mixed models with GCTA within each cohort. No associations were seen in the MACS cohort. P-values and beta values are presented to show the level and direction of the association.

**Supplemental Table 2. Top predicted changes associated with rs7919208 allelic variation in GM12878**

| <b>Transcription factor</b> | <b>Effect (Log2fold change)</b> | <b>E-value</b> | <b>Normalized Prob. (Reference)</b> | <b>Normalized Prob. (Alternative)</b> |
|-----------------------------|---------------------------------|----------------|-------------------------------------|---------------------------------------|
| BATF                        | 3.27                            | 0.00004        | 0.13                                | 0.60                                  |
| JUND                        | 2.91                            | 0.00009        | 0.12                                | 0.50                                  |
| MEF2A                       | 2.06                            | 0.00026        | 0.09                                | 0.28                                  |
| MEF2C                       | 1.98                            | 0.00022        | 0.08                                | 0.26                                  |
| BCL11A                      | 2.19                            | 0.00040        | 0.07                                | 0.25                                  |
| P300                        | 1.74                            | 0.00055        | 0.08                                | 0.22                                  |
| IRF4                        | 2.12                            | 0.00033        | 0.06                                | 0.21                                  |

Significant changes induced by rs7919208 as predicted by DeepSEA for transcription factors with a normalized probability (Prob.) above 0.20 in the GM12878 lymphoblastoid cell line. The E-value is the expected proportion of variants with a larger predicted effect between the reference and alternative allele for a certain chromatin feature based on predicted effects calculated for variants in The 1000 Genomes Project.

**Supplemental Table 3. Comparisons with genome-wide significant variants identified in GWAS of NHL in the general population**

| SNP         | Gene         | Publication                       | Subtype  | META P | SHCS P | ANRS P | MACS P | OR   | Mean MAF | POWER (P<0.05) | POP |
|-------------|--------------|-----------------------------------|----------|--------|--------|--------|--------|------|----------|----------------|-----|
| rs116446171 | EXOC2        | Cerhan et al. <sup>16</sup>       | DLBCL    | NA     | NA     | NA     | 0.08   | 2.20 | 0.01     | 58%            | EUR |
| rs12195582  | HLA region   | Skibola et al. <sup>24</sup>      | FL       | 0.33   | 0.47   | 0.51   | NA     | 1.78 | 0.41     | 100%           | EUR |
| rs12289961  | LPXN         | Vijai et al. (2013) <sup>23</sup> | DLBCL+FL | 0.88   | 0.40   | 0.14   | 0.46   | 1.29 | 0.22     | 74%            | EUR |
| rs13254990  | PVT1         | Skibola et al. <sup>24</sup>      | FL       | 0.75   | NA     | 0.58   | 0.82   | 1.18 | 0.32     | 48%            | EUR |
| rs13255292  | PVT1         | Cerhan et al. <sup>16</sup>       | DLBCL    | 0.83   | NA     | 0.72   | 0.90   | 1.22 | 0.32     | 62%            | EUR |
| rs17203612  | HLA class II | Skibola et al. <sup>24</sup>      | FL       | NA     | 0.82   | NA     | NA     | 1.44 | 0.38     | 98%            | EUR |
| rs17749561  | BCL2         | Skibola et al. <sup>24</sup>      | FL       | 0.74   | NA     | 0.72   | 0.98   | 1.34 | 0.10     | 61%            | EUR |
| rs2523607   | HLA-B        | Cerhan et al. <sup>16</sup>       | DLBCL    | 0.50   | 0.30   | 0.77   | NA     | 1.32 | 0.08     | 49%            | EUR |
| rs2922994   | HLA-B        | Vijai et al. (2015) <sup>25</sup> | MZL      | 0.55   | 0.30   | 0.66   | NA     | 1.64 | 0.08     | 93%            | EUR |
| rs3130437   | HLA class I  | Skibola et al. <sup>24</sup>      | FL       | 0.33   | 0.47   | NA     | 0.46   | 1.23 | 0.38     | 68%            | EUR |
| rs4733601   | PVT1         | Cerhan et al. <sup>16</sup>       | DLBCL    | 0.29   | NA     | 0.38   | 0.57   | 1.18 | 0.49     | 51%            | EUR |
| rs4937362   | ETS1         | Skibola et al. <sup>24</sup>      | FL       | 0.62   | 0.61   | 0.90   | NA     | 1.17 | 0.45     | 47%            | EUR |
| rs4938573   | CXCR5        | Skibola et al. <sup>24</sup>      | FL       | 0.60   | 0.25   | 0.72   | 0.18   | 1.34 | 0.19     | 81%            | EUR |
| rs6444305   | LPP          | Skibola et al. <sup>24</sup>      | FL       | NA     | NA     | NA     | NA     | 1.21 | NA       | NA             | EUR |
| rs6457327   | HLA          | Lim et al. <sup>55</sup>          | DLBCL+FL | 0.66   | 0.80   | 0.85   | 0.18   | 1.30 | 0.35     | 85%            | EUR |
| rs6773854   | BCL6         | Tan et al. <sup>26</sup>          | DLBCL    | 0.30   | 0.51   | 0.73   | 0.07   | 1.44 | 0.21     | 95%            | CHN |
| rs79480871  | NCOA1        | Cerhan et al. <sup>16</sup>       | DLBCL    | NA     | NA     | NA     | NA     | 1.34 | 0.08     | 54%            | EUR |
| rs9461741   | BTNL2        | Vijai et al. (2015) <sup>25</sup> | MZL      | 0.97   | 0.72   | 0.67   | NA     | 2.66 | 0.03     | 99%            | EUR |

Comparisons with genome-wide significant variants identified in published GWAS of NHL in the general population. The NHL subtypes includes DLBCL (Diffuse large B-cell lymphoma), FL (Follicular lymphoma) and MZL (Marginal zone lymphoma). P-values for the HIV meta-analysis and the individual cohort GWAS are shown per variant. The statistical power to replicate the published variants under an additive model at  $P < 0.05$ , given their published odds ratios (OR) and the mean observed minor allele frequencies (MAF) in the HIV cohorts is also listed. Most of the published GWAS was on European (EUR) patients and Chinese (CHN).

**Supplemental Table 4. The effect of rs7919208 in GWAS in the general population**

| <b>Subtype</b> | <b>Cases</b> | <b>Controls</b> | <b>Lambda</b> | <b>P (rs7919208)</b> | <b>OR (rs7919208)</b> |
|----------------|--------------|-----------------|---------------|----------------------|-----------------------|
| CLL            | 1033         | 2635            | 1.04          | 0.29                 | 0.97                  |
| DLBCL          | 2173         | 2635            | 1.04          | 0.65                 | 1.01                  |
| FL             | 1753         | 2635            | 1.03          | 0.36                 | 0.97                  |
| MZL            | 617          | 2635            | 1.01          | 0.56                 | 0.98                  |
| Combined       | 5556         | 2635            | 1.04          | 0.60                 | 0.99                  |

The association of rs7919208 in the general (non-HIV) population across NHL subtypes. Lambda indicates the genome-wide inflation factor for the GWAS performed for each subtype to ensure the test-statistics observed are valid. The calculated p-values and odds ratios for rs7919208 are listed for each GWAS.

## Supplementary Figures

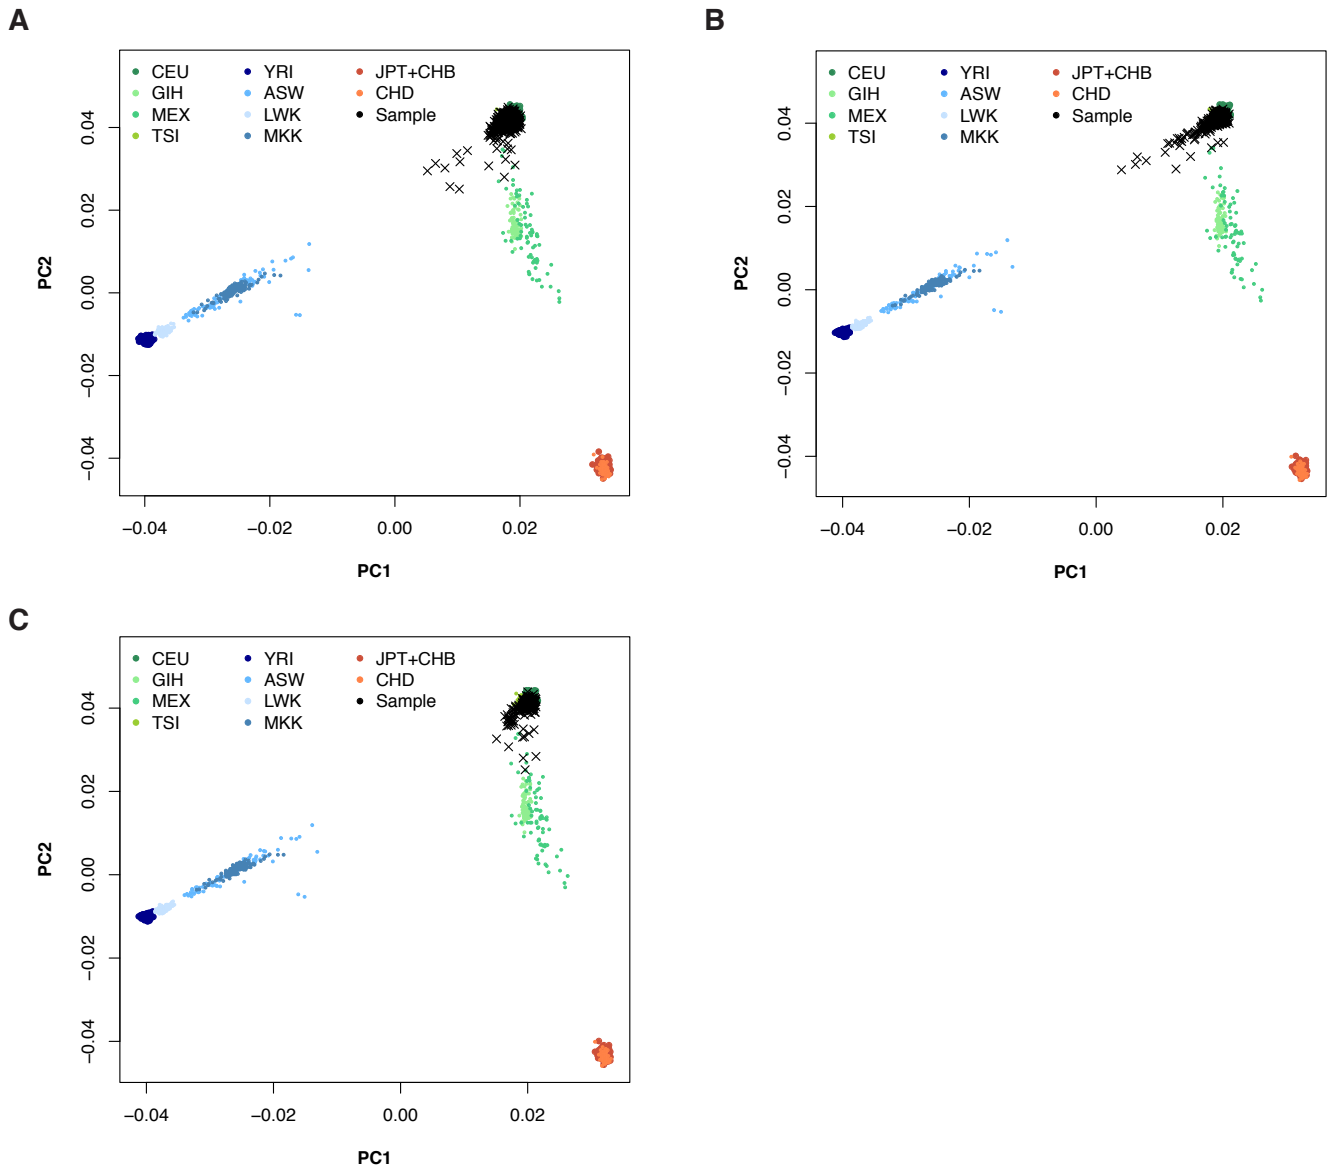

**Supplemental Figure 1. Principal component analyses (PCA) with the HapMap project.** The black crosses represent individuals genotyped and included in this study. Individuals of European ancestry colocalizes with the HapMap reference samples from CEU (Northern Europeans from Utah) and TSI (Tuscans from Italy). (A) The SHCS cohort. (B) The ANRS cohort. (C) The MACS cohort.

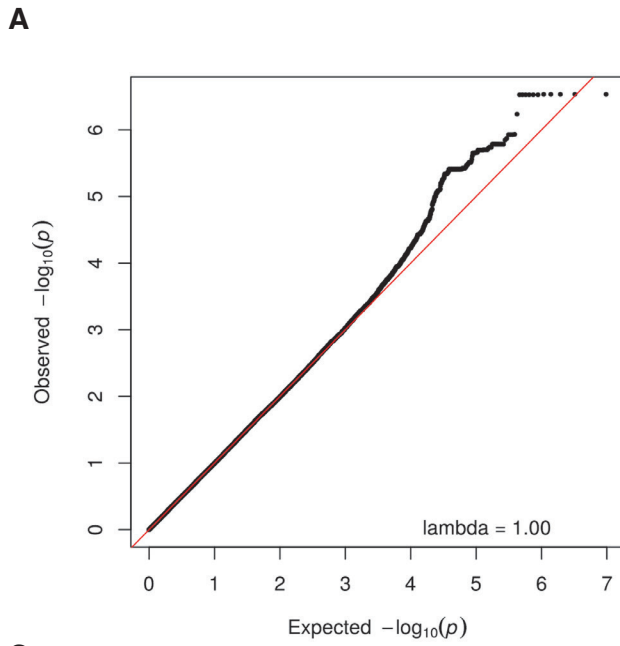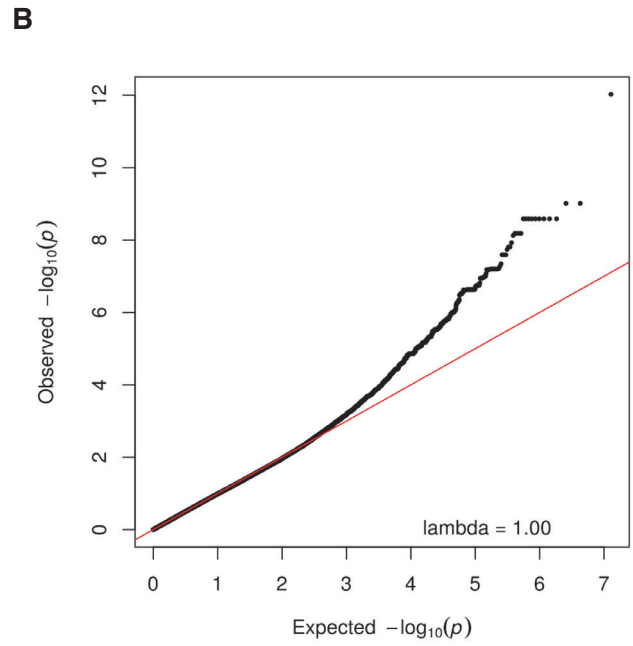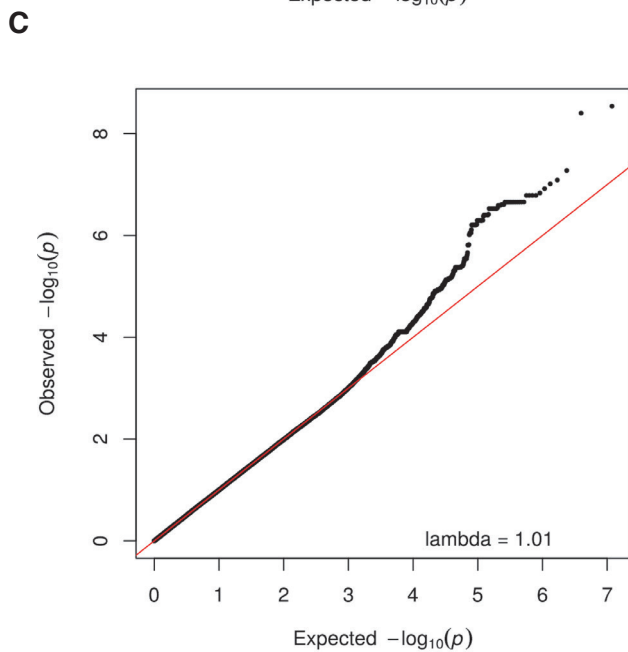

**Supplemental Figure 2. Quantile-quantile plots for the initial cohort level GWAS.** Lambda indicates the genome-wide inflation factor. Values  $\sim 1$  denotes the lack of genomic inflation due to confounding factors. (A) Plot for the GWAS in the SHCS cohort. (B) Plot or the GWAS in the ANRS cohort. (C) Plot for the GWAS in the ANRS cohort.

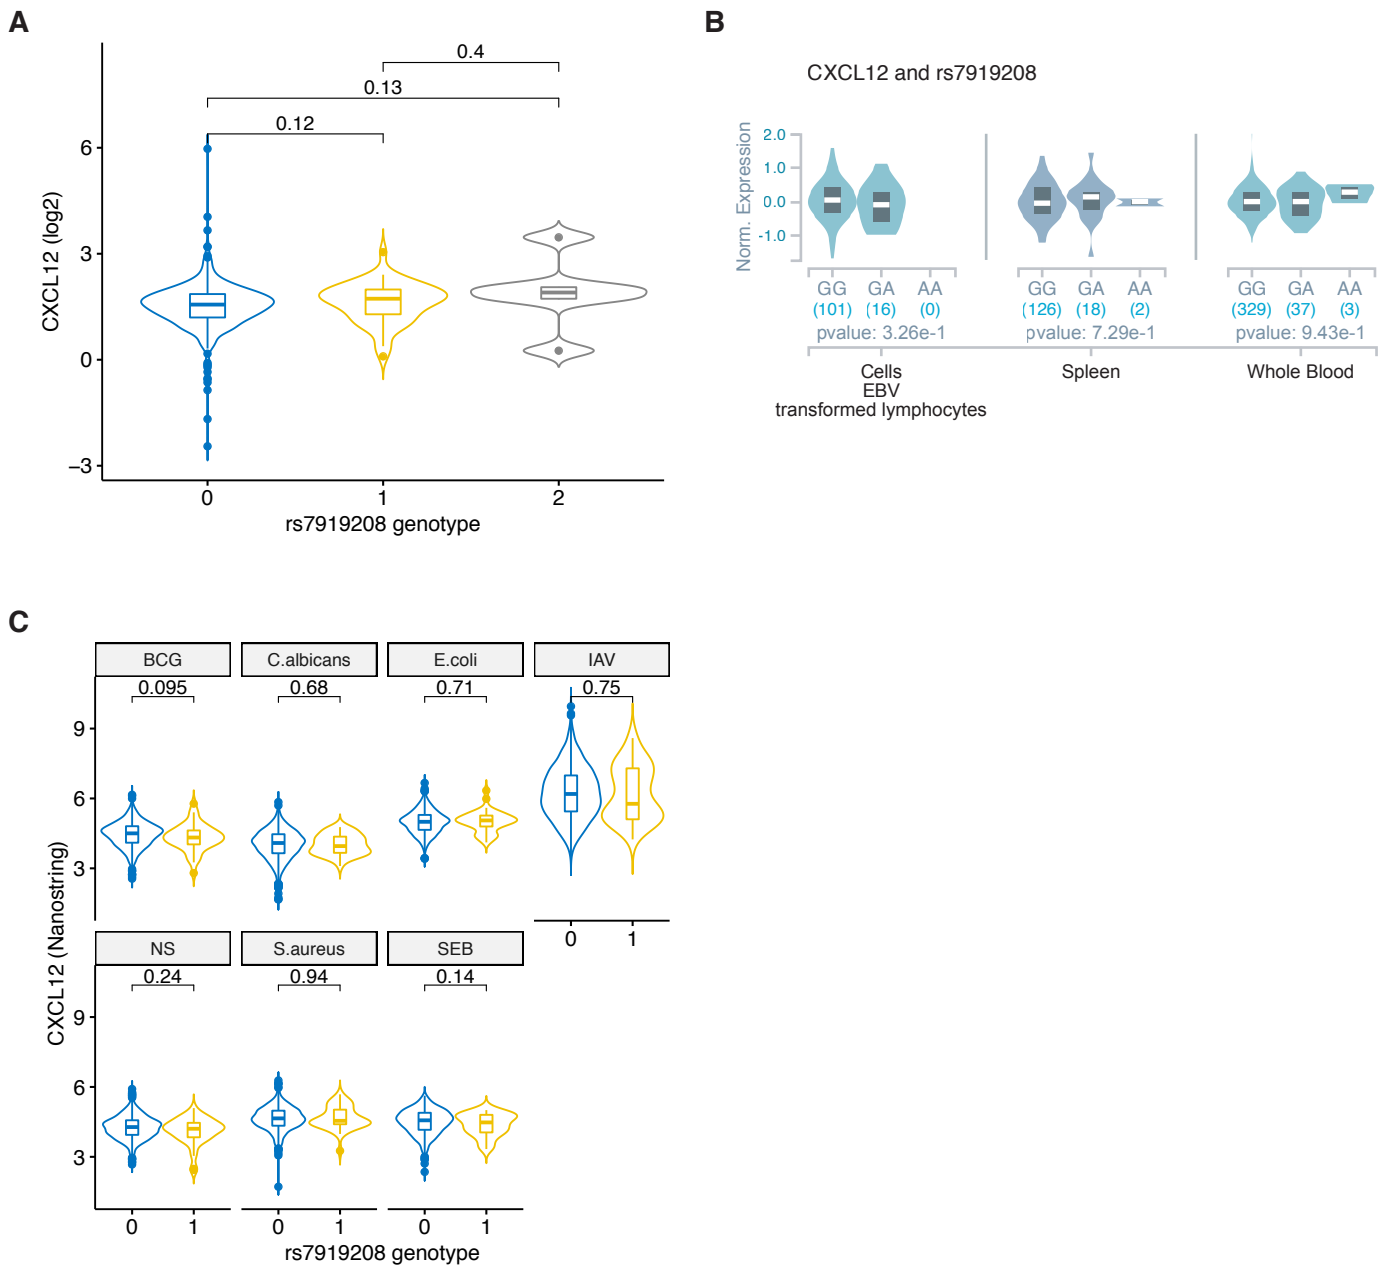

**Supplemental Figure 3. eQTL information on rs7919208.** (A) Expression levels of CXCL12 in EBV transformed lymphocytes from the GEUVADIS consortium according to the rs7919208 genotype. Differences between genotype groups were tested using Wilcoxon rank-sum tests with the obtained p-values shown on the figures. (B) Relationship between CXCL12 and the rs7919208 genotype in GTEx across EBV transformed lymphocytes, Spleen and Whole Blood. (C) Relationship between CXCL12 expression and rs1919208 using Nanostring in the Milieu Interieur Consortium for stimulated and non-stimulated (NS) PBMCs. Stimulants used were Mycobacterium bovis (BCG), Candida albicans, Escherichia coli, Influenza A virus (IAV), Staphylococcus aureus and Staphylococcal enterotoxin B (SEB).
